# Supplementary material
Source: PubMed Central journal article supplement (PMC2725265)
Supplement: mmc1.pdf [file mmc1.pdf]

The American Journal of Human Genetics Volume 85

**Supplemental Data**

**A Genome-wide In Vitro Bacterial-Infection Screen**

**Reveals Human Variation in the Host Response**

**Associated with Inflammatory Disease**

**Dennis C. Ko, Kajal P. Shukla, Christine Fong, Michael Wasnick, Mitchell J. Brittnacher, Mark M. Wurfel, Tarah D. Holden, Grant E. O'Keefe, Brian Van Yserloo, Joshua M. Akey, and Samuel I. Miller**

Figure S1. Absence of *CARD8* in a 24-mammal phylogenetic tree correlates with large group size. A mirror tree of 24 mammalian species displays colour-coded group size on the left and presence of *CARD8* on the right. Details regarding putative orthologues can be found in Table S1. From Pagel's test of independent evolution<sup>31</sup>, a p-value of 0.04 is obtained from 1000 simulations. This tree contains all mammalian species with genomes in UCSC and Ensembl, including those where low genome coverage makes calls of *CARD8* presence or absence less confident. Image was exported from Mesquite<sup>32</sup>.

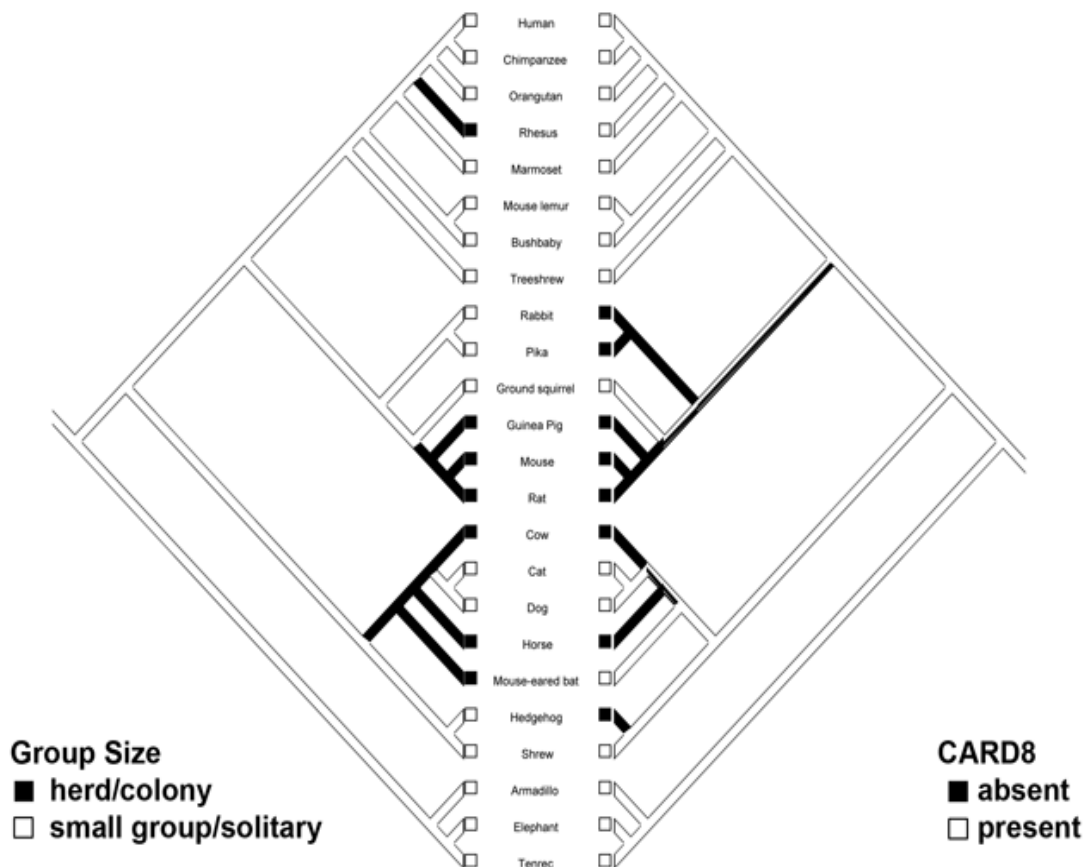

| Table S1. CARD8 orthologues |                       |                       |                                          |                        |                   |                       |                                  |            |                                                                                                                                                                                               |
|-----------------------------|-----------------------|-----------------------|------------------------------------------|------------------------|-------------------|-----------------------|----------------------------------|------------|-----------------------------------------------------------------------------------------------------------------------------------------------------------------------------------------------|
| Species                     | Coverage <sup>a</sup> | Identification method | Ensembl genelink or UCSC prediction link | Chromosome or scaffold | Location          | Ensembl BLAST e-value | Top Human BLAST hit <sup>b</sup> | Present?   | Comments                                                                                                                                                                                      |
| <i>Primata</i>              |                       |                       |                                          |                        |                   |                       |                                  |            |                                                                                                                                                                                               |
| Homo sapiens                | finished              | UCSC query            | <a href="#">ENSG00000105483</a>          | 19                     | 53493325-53450962 |                       |                                  | yes        | complete; transcript is 1296bp                                                                                                                                                                |
| Pan troglodytes             | 6x                    | UCSC query            | <a href="#">ENSPTRG00000023499</a>       | 19                     | 53825604-53932307 | 4.90E-222             | CARD8                            | yes        | complete                                                                                                                                                                                      |
| Pongo pygmaeus              | 6x                    | UCSC query            | <a href="#">ENSPPYG00000010191</a>       | 19                     | 49661038-49778538 | 1.20E-203             | CARD8                            | yes        | complete                                                                                                                                                                                      |
| Macaca mulatta              | 5.1x                  | UCSC query            | <a href="#">ENSMMUG00000017111</a>       | 19                     | 54486773-54499436 | 1.40E-173             | CARD8                            | yes        | complete                                                                                                                                                                                      |
| Callithrix jacchus          | 6x                    | UCSC query            | <a href="#">Contig2244:73243-99350</a>   | Contig 2244            | 73243-99350       | not in Ensembl        | CARD8                            | yes        | complete                                                                                                                                                                                      |
| Otolemur garnettii          | 1.5x                  | Ensembl query         | <a href="#">ENSOGAG00000016636</a>       | Contig 436531          | 47623-78075       | 3.20E-136             | CARD8                            | yes        | N-terminus and three short internal stretches (~45 and ~151 bp) not yet found                                                                                                                 |
| Microcebus murinus          | 1.93x                 | Ensembl blast         | <a href="#">GENSCAN00000000849</a>       | Contig 406220          | 534-11947         | 5.90E-26              | NLRP1                            | likely yes | Predicted transcript extends 631 bp over 4 exons that align with CARD domain. Mouse lemur has a clear NLRP1 orthologue. This segment is either a part of a divergent CARD8 or a second NLRP1. |
| Tupaia belangeri            | 2x                    | Ensembl query         | <a href="#">ENSTBEG00000012091</a>       | Contig 528017          | 57915-84614       | 9.10E-73              | CARD8                            | yes        | Three internal stretches (~141, ~134, ~126 bp) not yet found                                                                                                                                  |



|                     |       |                   |                                    |                   |            |           |       |               |                                                                                                         |
|---------------------|-------|-------------------|------------------------------------|-------------------|------------|-----------|-------|---------------|---------------------------------------------------------------------------------------------------------|
| Myotis lucifugus    | 1.7x  | Ensembl blast     | <a href="#">GENSCAN00000295729</a> | Contig 106043     | 6058-15577 | 5.00E-51  | NLRP1 | likely<br>yes | Has ~8 genscan predictions that are similar to CARD8 and NLRP1, making it difficult to assign orthology |
| Erinaceus europaeus | 1.86x | CARD8 not present |                                    |                   |            |           |       | likely no     | low coverage genome                                                                                     |
| Sorex araneus       | 1.9x  | Ensembl blast     | <a href="#">GENSCAN00000317472</a> | Contig 239443     | 4668-19938 | 1.10E-46  | NLRP1 | likely<br>yes | 1167 bp transcript, but missing N-term. Already has a clear NLRP1 orthologue.                           |
| <i>Afrotheria</i>   |       |                   |                                    |                   |            |           |       |               |                                                                                                         |
| Loxodonta africana  | 2x    | Ensembl query     | <a href="#">ENSLAFG00000003556</a> | Contig 307228     | 458-43593  | 4.90E-131 | CARD8 | yes           | Two internal stretches (~192 and ~45bp) not yet found                                                   |
| Echinops telfairi   | 2x    | Ensembl blast     | <a href="#">GENSCAN00000132977</a> | conting<br>734181 | 581-752    | 2.50E-14  | CARD8 | likely<br>yes | Only 172 bp found so far, corresponding to C-term of protein. 64% protein identity with CARD8           |
| <i>Xenarthra</i>    |       |                   |                                    |                   |            |           |       |               |                                                                                                         |
| Dasyus novemcinctus | 2x    | Ensembl blast     | <a href="#">ENSDNOG00000007165</a> | Scaffold 7797     | 6069-29001 | 1.20E-63  | CARD8 | yes           | One internal stretch of ~427bp not yet found from middle of transcript                                  |

<sup>a</sup>Due to the low coverage in some of these genomes (2x coverage means that ~14% of the genome is likely to have been missed), calls for absence of CARD8 in these species may not prove to be accurate.

<sup>b</sup>The top BLAST hit using the putative CARD8 orthologue against all human proteins. NLRP1 was likely acquired as a duplication of CARD8 followed by acquisition of NACHT and LRR domains.<sup>56</sup>

| <b>Table S2. No association between <i>CARD8</i> rs2043211 and risk of sepsis in trauma patients</b> |             |             |            |                      |
|------------------------------------------------------------------------------------------------------|-------------|-------------|------------|----------------------|
| <i>Trauma patients with or without sepsis</i>                                                        | AA          | AT          | TT         | p-value <sup>a</sup> |
| Trauma with sepsis (n=669)                                                                           | 317 (47.4%) | 289 (43.2%) | 63 (9.4%)  | 0.53                 |
| Trauma with SIRS without infection (n=759)                                                           | 349 (46.0%) | 330 (43.5%) | 80 (10.5%) |                      |

Genotypes are relative to the + strand of chromosome 19. *CARD8* coding sequence is on the - strand.

<sup>a</sup>p-value is for the Cochran-Armitage trend test using a genotypic model with scores of 0, 0.75, and 1 for the 3 genotypes.
